# Supplementary material
Source: PubMed Central journal article supplement (PMC5056801)
Supplement: NIHMS785598-supplement-01.pdf [file NIHMS785598-supplement-01.pdf]

## **SUPPLEMENTARY MATERIAL**

### **Early-life gut microbiome composition is associated with milk allergy resolution**

Supinda Bunyavanich, MD, MPH<sup>1,2\*</sup>, Nan Shen, PhD<sup>1</sup>, Alexander Grishin, PhD<sup>2</sup>, Robert Wood, MD<sup>3</sup>, Wesley Burks, MD<sup>4</sup>, Peter Dawson, PhD<sup>5</sup>, Stacie M. Jones, MD<sup>6</sup>, Donald Leung, MD, PhD<sup>7</sup>, Hugh Sampson, MD<sup>8</sup>, Scott Sicherer, MD<sup>9</sup>, Jose C. Clemente, PhD<sup>1,8\*</sup>

**Supplementary Table 1: Baseline characteristics of the participants stratified by age at time of stool collection**

| Characteristics                             | All subjects with milk allergy included in the analysis | Age 3-6 months | Age 7-12 months | Age 13-16 months | P-value* |
|---------------------------------------------|---------------------------------------------------------|----------------|-----------------|------------------|----------|
| Subjects                                    | 226                                                     | 29 (12.8%)     | 144 (63.7%)     | 53 (23.4%)       |          |
| Age at last followup (months) – median(IQR) | 80.0 (18.0)                                             | 72.4 (18.8)    | 79.4 (22.5)     | 83.6 (10.8)      |          |
| Sex                                         |                                                         |                |                 |                  | 0.23     |
| Female                                      | 77                                                      | 14 (18.2%)     | 46 (59.7%)      | 17 (22.1%)       |          |
| Male                                        | 149                                                     | 15 (10.1%)     | 98 (65.8%)      | 36 (24.2%)       |          |
| Race                                        |                                                         |                |                 |                  | 0.02     |
| White                                       | 174                                                     | 16 (9.2%)      | 112 (64.4%)     | 46 (26.4%)       |          |
| Black/African-American                      | 30                                                      | 8 (26.7%)      | 16 (53.3%)      | 6 (20%)          |          |
| Asian                                       | 19                                                      | 5 (26.3%)      | 13 (68.4%)      | 1 (5.3%)         |          |
| Other                                       | 3                                                       | 0 (0.0%)       | 3 (100.0%)      | 0 (0.0%)         |          |
| Baseline milk IgE level                     |                                                         |                |                 |                  | 0.17     |
| <2                                          | 91                                                      | 18 (19.8%)     | 52 (57.1%)      | 21 (23.1%)       |          |
| ≥ 2-10                                      | 68                                                      | 6 (8.8%)       | 46 (67.6%)      | 16 (23.5%)       |          |
| ≥10                                         | 67                                                      | 5 (7.5%)       | 46 (68.7%)      | 16 (23.9%)       |          |
| Baseline milk SPT response (wheal in mm)    |                                                         |                |                 |                  | 0.0005   |
| <5                                          | 63                                                      | 18 (28.6%)     | 29 (46.0%)      | 16 (25.4%)       |          |
| 5-10                                        | 82                                                      | 7 (8.5%)       | 56 (68.3%)      | 19 (23.2%)       |          |
| >10                                         | 81                                                      | 4 (4.9%)       | 59 (72.8%)      | 18 (22.2%)       |          |
| Baseline AD severity                        |                                                         |                |                 |                  | 0.01     |
| None                                        | 29                                                      | 4 (13.8%)      | 15 (51.7%)      | 10 (34.5%)       |          |
| Mild                                        | 32                                                      | 0 (0.0%)       | 24 (75.0%)      | 8 (25.0%)        |          |

|                                          |     |            |             |            |          |
|------------------------------------------|-----|------------|-------------|------------|----------|
| Moderate                                 | 126 | 14 (11.1%) | 83 (65.9%)  | 29 (23.0%) |          |
| Severe                                   | 39  | 11 (28.2%) | 22 (56.4%)  | 6 (15.4%)  |          |
| Breast-feeding at entry                  |     |            |             |            | 0.15     |
| Never                                    | 36  | 6 (16.7%)  | 22 (61.1%)  | 8 (22.2%)  |          |
| Yes, currently                           | 115 | 14 (12.2%) | 67 (58.3%)  | 34 (29.6%) |          |
| Yes, but no longer                       | 75  | 9 (12.0%)  | 55 (73.3%)  | 11 (14.7%) |          |
| Mode of delivery**                       |     |            |             |            | 0.04     |
| Vaginal                                  | 140 | 23 (16.4%) | 90 (64.3%)  | 27 (19.3%) |          |
| C-section                                | 85  | 6 (7.1%)   | 53 (62.4%)  | 26 (30.6%) |          |
| Solid food intake                        |     |            |             |            | 2.8x10-7 |
| Yes                                      | 219 | 22 (10.0%) | 144 (65.8%) | 53 (24.2%) |          |
| No                                       | 7   | 7 (100.0%) | 0 (0.0%)    | 0 (0.0%)   |          |
| Antibiotics – lifetime prior to sampling |     |            |             |            | 0.01     |
| Yes                                      | 142 | 11 (7.7%)  | 95 (66.9%)  | 36 (25.4%) |          |
| No                                       | 84  | 18 (21.4%) | 49 (58.3%)  | 17 (20.2%) |          |

\*\*Data N/A for 1 subject

\*Fisher's Exact test

**Supplementary Table 2: Association between early life exposures and main outcomes of interest**

|                      | Milk allergy resolution by age 8 years<br>OR (95% CI) | Sensitization to milk at baseline<br>OR (95% CI) |
|----------------------|-------------------------------------------------------|--------------------------------------------------|
| Mode of delivery     | 1.08 (0.61-1.94)                                      | 1.50 (0.72-3.27)                                 |
| Breastfeeding status |                                                       |                                                  |
| Never                | reference                                             | Reference                                        |
| Yes, currently       | 0.92 (0.42-1.97)                                      | 0.72 (0.25-1.83)                                 |
| Yes, no longer       | 0.65 (0.29-1.46)                                      | 0.74 (0.24-2.00)                                 |
| Solid food intake    | 0.51 (0.05-3.20)                                      | 10.38 (1.63-112.62)                              |
| Antibiotic use       | 1.05 (0.58-1.87)                                      | 1.48 (0.73-2.99)                                 |

**Supplementary Table 3. Results for tests of association between bacterial functional pathways and milk allergy resolution using STAMP.** Subjects were stratified by age (3-6 months, 7-12 months, 13-16 months). PICRUSt-predicted KEGG metabolic pathways were utilized as input for STAMP analysis. ANOVA with Tukey-Kramer post-hoc test and Benjamini-Hochberg FDR correction for multiple testing were utilized to test for associations between each pathway and resolution or persistence. Effect size was measured as  $\eta^2$ . Pathways are represented using standard KEGG conventions, e.g. “Metabolism” at the top level, “Lipid Metabolism” as the second level, and “Fatty acid metabolism” at the lowest level. Degenerate cases where the test statistic could not be calculated are indicated. See file [Bacterial\\_functional\\_pathways\\_milk\\_resolution\\_STAMP.xlsx](#).

**Supplementary Figure 1. Linear discriminant analysis shows distinct gut microbiome composition associated with milk allergy resolution regardless of covariates.** After accounting for specific covariates known to play a role in shaping infant microbiome composition, taxa within *Clostridia* and *Firmicutes* were still enriched in children sampled at age 3-6 months with milk allergy resolution vs. milk allergy persistence by age 8 years, while taxa within *Bacteroidetes* were underrepresented. Linear Discriminant Analysis scores as calculated by LEfSe are presented for antibiotics, breastfeeding, mode of delivery, race, and solid food intake. All taxa were significantly associated with either resolution or persistence of milk allergy ( $P < 0.05$ ). Only taxa with LDA scores  $>2$  are presented.





|                                                        |                                                       |             |             |                                                 |             |             |             |             |
|--------------------------------------------------------|-------------------------------------------------------|-------------|-------------|-------------------------------------------------|-------------|-------------|-------------|-------------|
| Metabolism Lipid metabolism                            | Lipid metabolism_Unclassified                         | 0.843860869 | 276.7863649 | 0.001462523                                     | 0.146009196 | 0.054308209 | 0.149148573 | 0.027385534 |
| Metabolism Biosynthesis of Other Secondary Metabolites | Stilbenoid, diarylheptanoid and gingerol biosynthesis | 0.876071468 | 287.3514416 | 0.00091718                                      | 0.001757368 | 0.004243124 | 0.002009992 | 0.003919988 |
| Metabolism Metabolism of Terpenoids and Polyketides    | Prenyltransferases                                    | 0.897233102 | 294.2924575 | 0.000629185                                     | 0.287896653 | 0.068070199 | 0.290573069 | 0.038523696 |
| Metabolism Lipid Metabolism                            | Lipid biosynthesis proteins                           | 0.923254833 | 302.8275852 | 0.000350078                                     | 0.527921102 | 0.049050206 | 0.526067061 | 0.047464845 |
| Metabolism Biosynthesis of Other Secondary Metabolites | Streptomycin biosynthesis                             | 0.935087267 | 306.7086237 | 0.000250243                                     | 0.276899212 | 0.079469545 | 0.27882474  | 0.041941986 |
| Metabolism Biosynthesis of Other Secondary Metabolites | Butirosin and neomycin biosynthesis                   | 0.937216743 | 307.4070917 | 0.000234062                                     | 0.056446665 | 0.023119498 | 0.056992273 | 0.01247638  |
| Metabolism Amino acid metabolism                       | Amino acid metabolism_Unclassified                    | 0.93995026  | 308.3036853 | 0.000214089                                     | 0.219963849 | 0.067246139 | 0.221536632 | 0.040227637 |
| Metabolism Lipid Metabolism                            | Secondary bile acid biosynthesis                      | 0.954781921 | 313.16847   | 0.0001213                                       | 0.033027318 | 0.022249225 | 0.033374427 | 0.008613916 |
| Metabolism Biosynthesis of Other Secondary Metabolites | Isoflavonoid biosynthesis                             | 0.979875552 | 321.3991811 | 2.40E-05                                        | 3.31E-07    | 1.05E-06    | 3.44E-07    | 1.42E-06    |
| Metabolism Xenobiotics Biodegradation and Metabolism   | Xylene degradation                                    | 0.980292846 | 321.5360534 | 2.30E-05                                        | 0.067656022 | 0.022473245 | 0.067478882 | 0.014434701 |
| Metabolism Xenobiotics Biodegradation and Metabolism   | Ethylbenzene degradation                              | 0.981598092 | 321.9641742 | 2.01E-05                                        | 0.039260169 | 0.012778844 | 0.039123785 | 0.015865002 |
| Metabolism Lipid Metabolism                            | Primary bile acid biosynthesis                        | 0.989429314 | 324.5328149 | 6.62E-06                                        | 0.033665751 | 0.021984565 | 0.033745806 | 0.008467424 |
| Metabolism Biosynthesis of Other Secondary Metabolites | Clavulanic acid biosynthesis                          | 1           | 328         | -1 degenerate case: failed to calculate p-value | 0           | 0           | 0           | 0           |
| Metabolism Enzyme Families                             | Cytochrome P450                                       | 1           | 328         | -1 degenerate case: failed to calculate p-value | 0           | 0           | 0           | 0           |
| Metabolism Glycan Biosynthesis and Metabolism          | Glycosaminoglycan biosynthesis - chondroitin sulfate  | 1           | 328         | -1 degenerate case: failed to calculate p-value | 0           | 0           | 0           | 0           |
| Metabolism Glycan Biosynthesis and Metabolism          | Glycosylphosphatidylinositol(GPI)-anchor biosynthesis | 1           | 328         | -1 degenerate case: failed to calculate p-value | 0           | 0           | 0           | 0           |
| Metabolism Glycan Biosynthesis and Metabolism          | Other types of O-glycan biosynthesis                  | 1           | 328         | -1 degenerate case: failed to calculate p-value | 0           | 0           | 0           | 0           |
| Metabolism Metabolism of Terpenoids and Polyketides    | Biosynthesis of 12-, 14- and 16-membered macrolides   | 1           | 328         | -1 degenerate case: failed to calculate p-value | 0           | 0           | 0           | 0           |
| Metabolism Metabolism of Terpenoids and Polyketides    | Biosynthesis of type II polyketide backbone           | 1           | 328         | -1 degenerate case: failed to calculate p-value | 0           | 0           | 0           | 0           |
| Metabolism Metabolism of Terpenoids and Polyketides    | Sesquiterpenoid biosynthesis                          | 1           | 328         | -1 degenerate case: failed to calculate p-value | 0           | 0           | 0           | 0           |







|                                                                     |                                                                       |             |             |                                                 |             |             |             |             |
|---------------------------------------------------------------------|-----------------------------------------------------------------------|-------------|-------------|-------------------------------------------------|-------------|-------------|-------------|-------------|
| Metabolism Metabolism of Cofactors and Vitamins                     | Ubiquinone and other terpenoid-quinone biosynthesis                   | 0.927171539 | 304.1122649 | 5.90E-05                                        | 0.155495786 | 0.088443053 | 0.156838781 | 0.085074815 |
| Metabolism Biosynthesis of Other Secondary Metabolites              | Clavulanic acid biosynthesis                                          | 0.928191245 | 304.4467284 | 5.74E-05                                        | 3.81E-08    | 2.98E-07    | 4.35E-08    | 3.92E-07    |
| Metabolism Lipid Metabolism                                         | alpha-Linolenic acid metabolism                                       | 0.931610292 | 305.5681757 | 5.20E-05                                        | 0.007491134 | 0.012577925 | 0.007316072 | 0.01157112  |
| Metabolism Carbohydrate Metabolism                                  | Amino sugar and nucleotide sugar metabolism                           | 0.939045387 | 308.0068868 | 4.13E-05                                        | 1.525691638 | 0.152603198 | 1.523874396 | 0.1296052   |
| Metabolism Biosynthesis and biodegradation of secondary metabolites | Biosynthesis and biodegradation of secondary metabolites_Unclassified | 0.943409872 | 309.438438  | 3.56E-05                                        | 0.068022687 | 0.036682305 | 0.067604827 | 0.033071328 |
| Metabolism Xenobiotics Biodegradation and Metabolism                | Polycyclic aromatic hydrocarbon degradation                           | 0.956840584 | 313.8437115 | 2.07E-05                                        | 0.099518043 | 0.022695343 | 0.099320652 | 0.020519053 |
| Metabolism Biosynthesis of Other Secondary Metabolites              | Novobiocin biosynthesis                                               | 0.959421363 | 314.6902072 | 1.83E-05                                        | 0.135456232 | 0.012427849 | 0.135351882 | 0.011810023 |
| Metabolism Amino Acid Metabolism                                    | Amino acid related enzymes                                            | 0.969044566 | 317.8466177 | 1.06E-05                                        | 1.445095238 | 0.115708433 | 1.445854257 | 0.114820108 |
| Metabolism Amino Acid Metabolism                                    | Valine, leucine and isoleucine biosynthesis                           | 0.971387912 | 318.615235  | 9.09E-06                                        | 0.798994124 | 0.081837924 | 0.799505127 | 0.085451796 |
| Metabolism Biosynthesis of Other Secondary Metabolites              | Flavone and flavonol biosynthesis                                     | 0.976208377 | 320.1963476 | 6.29E-06                                        | 0.005054524 | 0.005178453 | 0.005080003 | 0.004918558 |
| Metabolism Metabolism of Terpenoids and Polyketides                 | Geraniol degradation                                                  | 0.976411912 | 320.2631072 | 6.18E-06                                        | 0.040314828 | 0.04608646  | 0.040090605 | 0.043562593 |
| Metabolism Glycan biosynthesis and metabolism                       | Glycan biosynthesis and metabolism_Unclassified                       | 0.980023833 | 321.4478174 | 4.43E-06                                        | 0.027993974 | 0.031267095 | 0.028119965 | 0.028343259 |
| Metabolism Energy Metabolism                                        | Photosynthesis proteins                                               | 0.99315022  | 325.7532722 | 5.21E-07                                        | 0.39252015  | 0.099267099 | 0.392408706 | 0.053065188 |
| Metabolism Amino Acid Metabolism                                    | Histidine metabolism                                                  | 0.999621254 | 327.8757714 | 1.59E-09                                        | 0.60178324  | 0.059634292 | 0.60178832  | 0.065495458 |
| Metabolism Glycan Biosynthesis and Metabolism                       | Glycosaminoglycan biosynthesis - chondroitin sulfate                  | 1           | 328         | -1 degenerate case: failed to calculate p-value | 0           | 0           | 0           | 0           |
| Metabolism Glycan Biosynthesis and Metabolism                       | Glycosylphosphatidylinositol(GPI)-anchor biosynthesis                 | 1           | 328         | -1 degenerate case: failed to calculate p-value | 0           | 0           | 0           | 0           |
| Metabolism Glycan Biosynthesis and Metabolism                       | Other types of O-glycan biosynthesis                                  | 1           | 328         | -1 degenerate case: failed to calculate p-value | 0           | 0           | 0           | 0           |
| Metabolism Metabolism of Terpenoids and Polyketides                 | Biosynthesis of 12-, 14- and 16-membered macrolides                   | 1           | 328         | -1 degenerate case: failed to calculate p-value | 0           | 0           | 0           | 0           |
| Metabolism Metabolism of Terpenoids and Polyketides                 | Biosynthesis of type II polyketide backbone                           | 1           | 328         | -1 degenerate case: failed to calculate p-value | 0           | 0           | 0           | 0           |
| Metabolism Metabolism of Terpenoids and Polyketides                 | Sesquiterpenoid biosynthesis                                          | 1           | 328         | -1 degenerate case: failed to calculate p-value | 0           | 0           | 0           | 0           |





|                                                        |                                                       |             |             |                                                 |             |             |             |             |
|--------------------------------------------------------|-------------------------------------------------------|-------------|-------------|-------------------------------------------------|-------------|-------------|-------------|-------------|
| Metabolism Lipid Metabolism                            | Lipid biosynthesis proteins                           | 0.934867523 | 306.6365477 | 0.000132233                                     | 0.54893116  | 0.051213294 | 0.549974231 | 0.039488007 |
| Metabolism Biosynthesis of Other Secondary Metabolites | Novobiocin biosynthesis                               | 0.947498573 | 310.7795321 | 8.59E-05                                        | 0.13426206  | 0.00986359  | 0.134438097 | 0.009057363 |
| Metabolism Energy Metabolism                           | Sulfur metabolism                                     | 0.947562563 | 310.8005208 | 8.56E-05                                        | 0.278881941 | 0.035179283 | 0.278278586 | 0.029926875 |
| Metabolism Amino acid metabolism                       | Amino acid metabolism_Unclassified                    | 0.949302819 | 311.3713247 | 8.00E-05                                        | 0.201792901 | 0.045628984 | 0.201025879 | 0.03991316  |
| Metabolism Biosynthesis of Other Secondary Metabolites | Flavone and flavonol biosynthesis                     | 0.955522814 | 313.4114829 | 6.16E-05                                        | 0.006963852 | 0.008258799 | 0.007084349 | 0.007071328 |
| Metabolism Metabolism of Other Amino Acids             | Phosphonate and phosphinate metabolism                | 0.959918581 | 314.8532947 | 5.00E-05                                        | 0.06005206  | 0.010363232 | 0.059891407 | 0.011900241 |
| Metabolism Energy Metabolism                           | Photosynthesis - antenna proteins                     | 0.976254636 | 320.2115208 | 1.75E-05                                        | 3.09E-05    | 6.62E-05    | 3.03E-05    | 8.63E-05    |
| Metabolism Energy Metabolism                           | Carbon fixation pathways in prokaryotes               | 0.976744082 | 320.372059  | 1.68E-05                                        | 0.924870865 | 0.091899017 | 0.925571139 | 0.078563156 |
| Metabolism Energy metabolism                           | Energy metabolism_Unclassified                        | 0.982314928 | 322.1992965 | 9.73E-06                                        | 0.778388217 | 0.116936608 | 0.779094115 | 0.108358105 |
| Metabolism Lipid Metabolism                            | Steroid hormone biosynthesis                          | 0.983417245 | 322.5608563 | 8.55E-06                                        | 0.020566688 | 0.022671196 | 0.020433963 | 0.02235168  |
| Metabolism Biosynthesis of Other Secondary Metabolites | Betalain biosynthesis                                 | 1           | 328         | -1 degenerate case: failed to calculate p-value | 0           | 0           | 0           | 0           |
| Metabolism Biosynthesis of Other Secondary Metabolites | Clavulanic acid biosynthesis                          | 1           | 328         | -1 degenerate case: failed to calculate p-value | 0           | 0           | 0           | 0           |
| Metabolism Biosynthesis of Other Secondary Metabolites | Indole alkaloid biosynthesis                          | 1           | 328         | -1 degenerate case: failed to calculate p-value | 0           | 0           | 0           | 0           |
| Metabolism Biosynthesis of Other Secondary Metabolites | Isoflavonoid biosynthesis                             | 1           | 328         | -1 degenerate case: failed to calculate p-value | 0           | 0           | 0           | 0           |
| Metabolism Glycan Biosynthesis and Metabolism          | Glycosaminoglycan biosynthesis - chondroitin sulfate  | 1           | 328         | -1 degenerate case: failed to calculate p-value | 0           | 0           | 0           | 0           |
| Metabolism Glycan Biosynthesis and Metabolism          | Glycosylphosphatidylinositol(GPI)-anchor biosynthesis | 1           | 328         | -1 degenerate case: failed to calculate p-value | 0           | 0           | 0           | 0           |
| Metabolism Glycan Biosynthesis and Metabolism          | Other types of O-glycan biosynthesis                  | 1           | 328         | -1 degenerate case: failed to calculate p-value | 0           | 0           | 0           | 0           |
| Metabolism Metabolism of Terpenoids and Polyketides    | Biosynthesis of 12-, 14- and 16-membered macrolides   | 1           | 328         | -1 degenerate case: failed to calculate p-value | 0           | 0           | 0           | 0           |
| Metabolism Metabolism of Terpenoids and Polyketides    | Biosynthesis of type II polyketide backbone           | 1           | 328         | -1 degenerate case: failed to calculate p-value | 0           | 0           | 0           | 0           |
| Metabolism Metabolism of Terpenoids and Polyketides    | Sesquiterpenoid biosynthesis                          | 1           | 328         | -1 degenerate case: failed to calculate p-value | 0           | 0           | 0           | 0           |

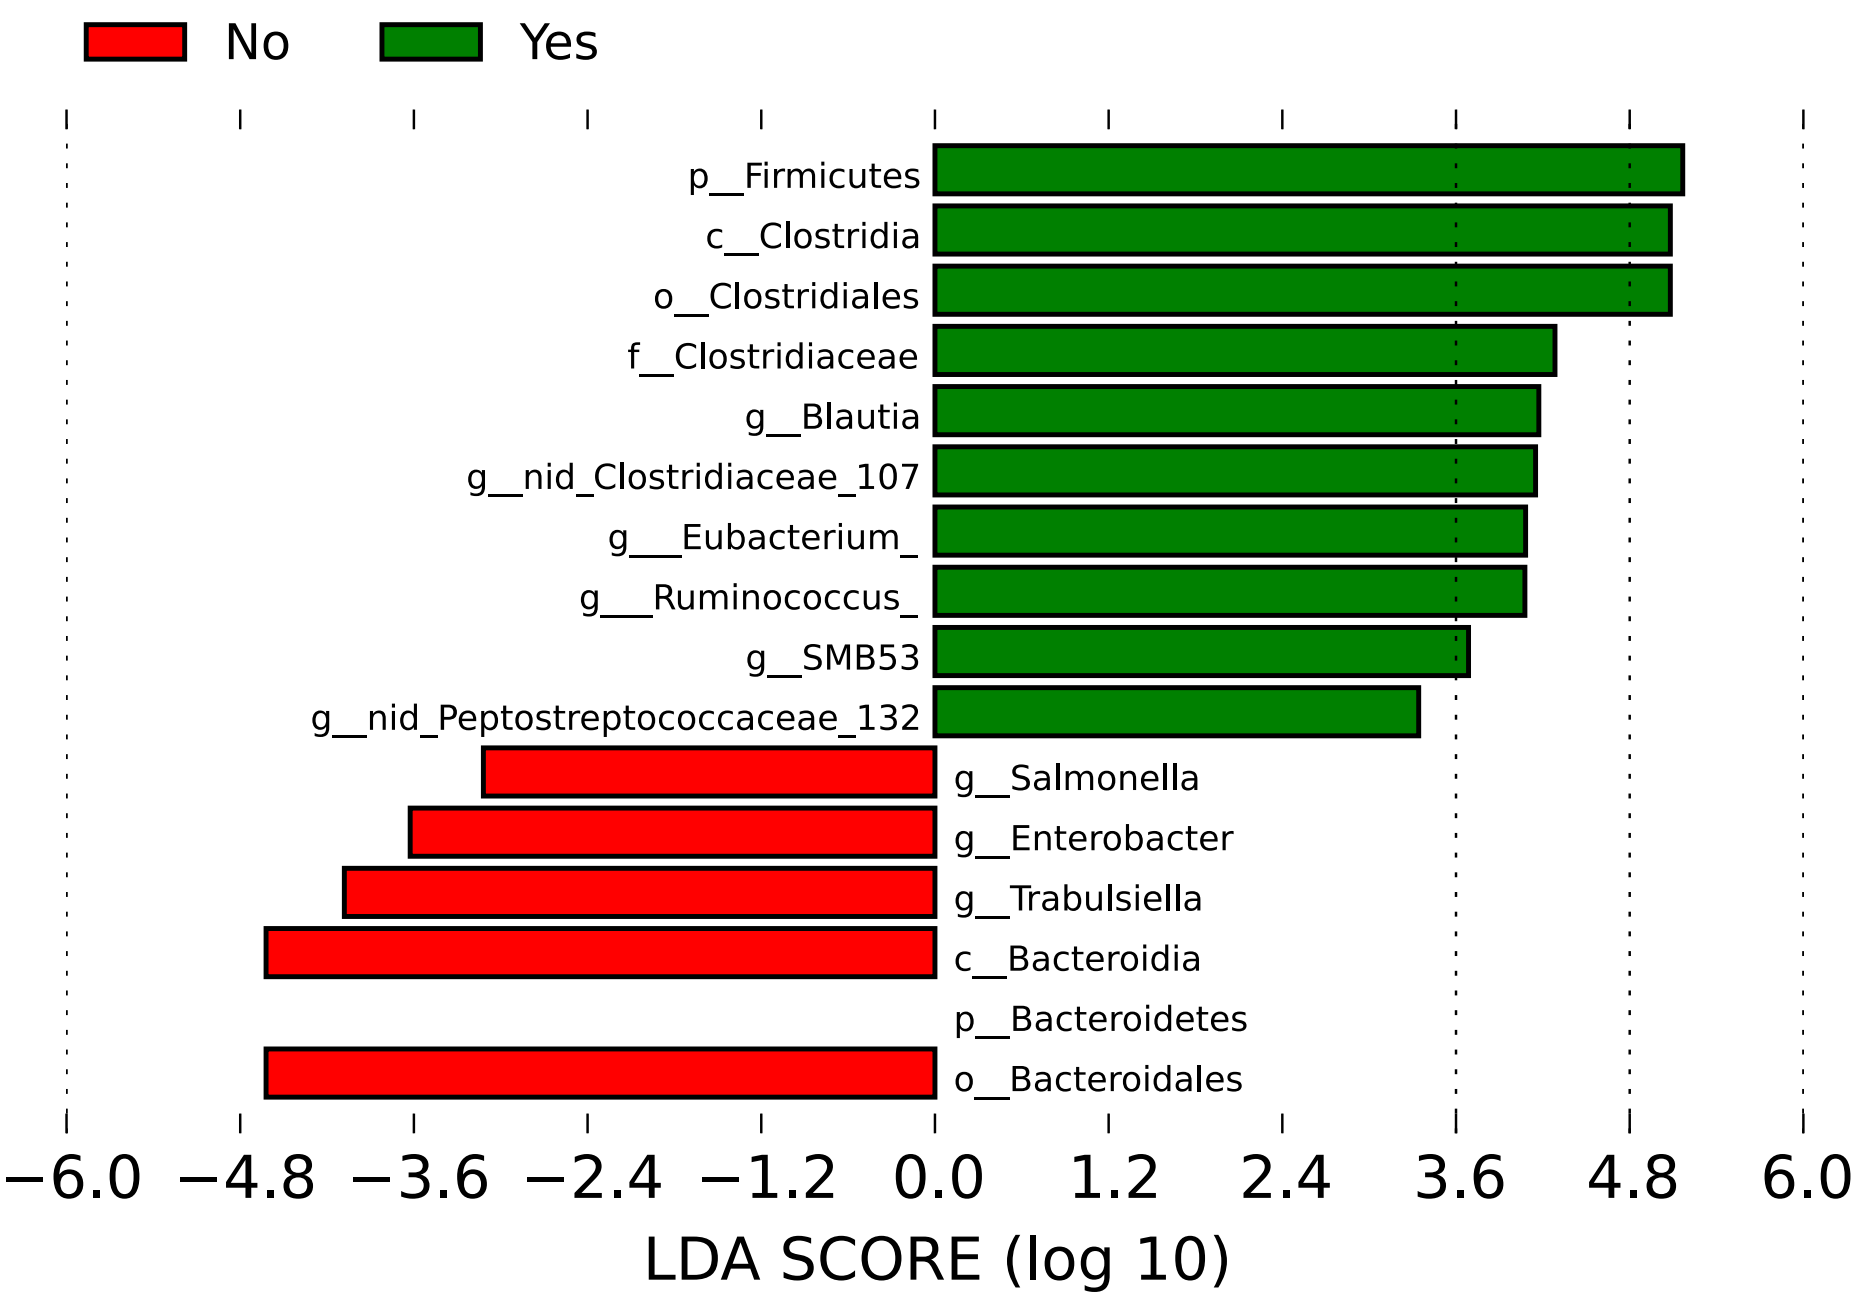

Antibiotics

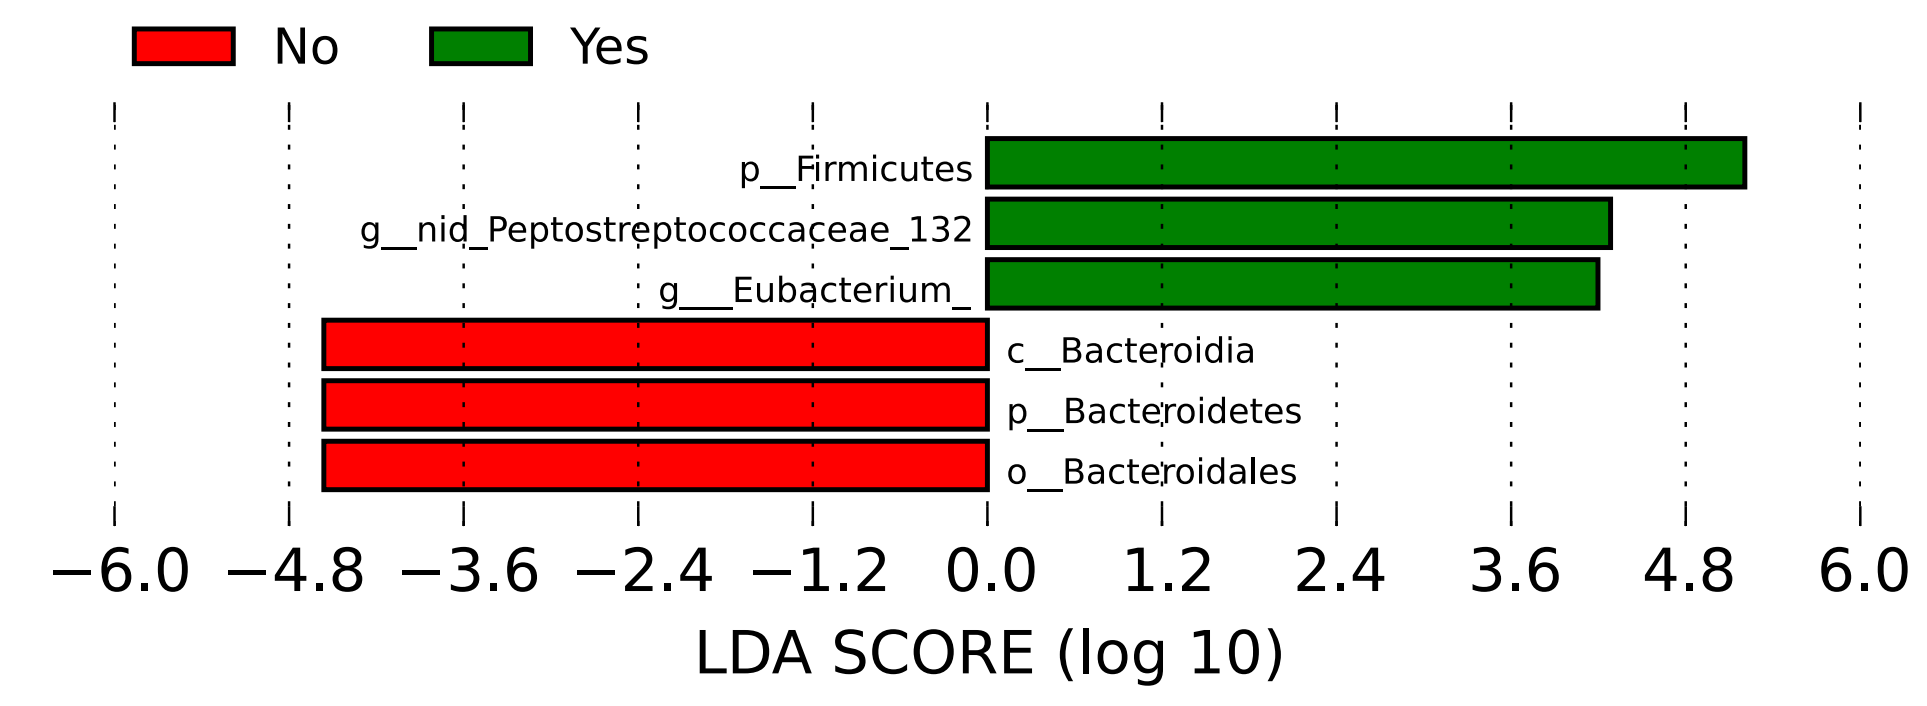

Breastfeeding

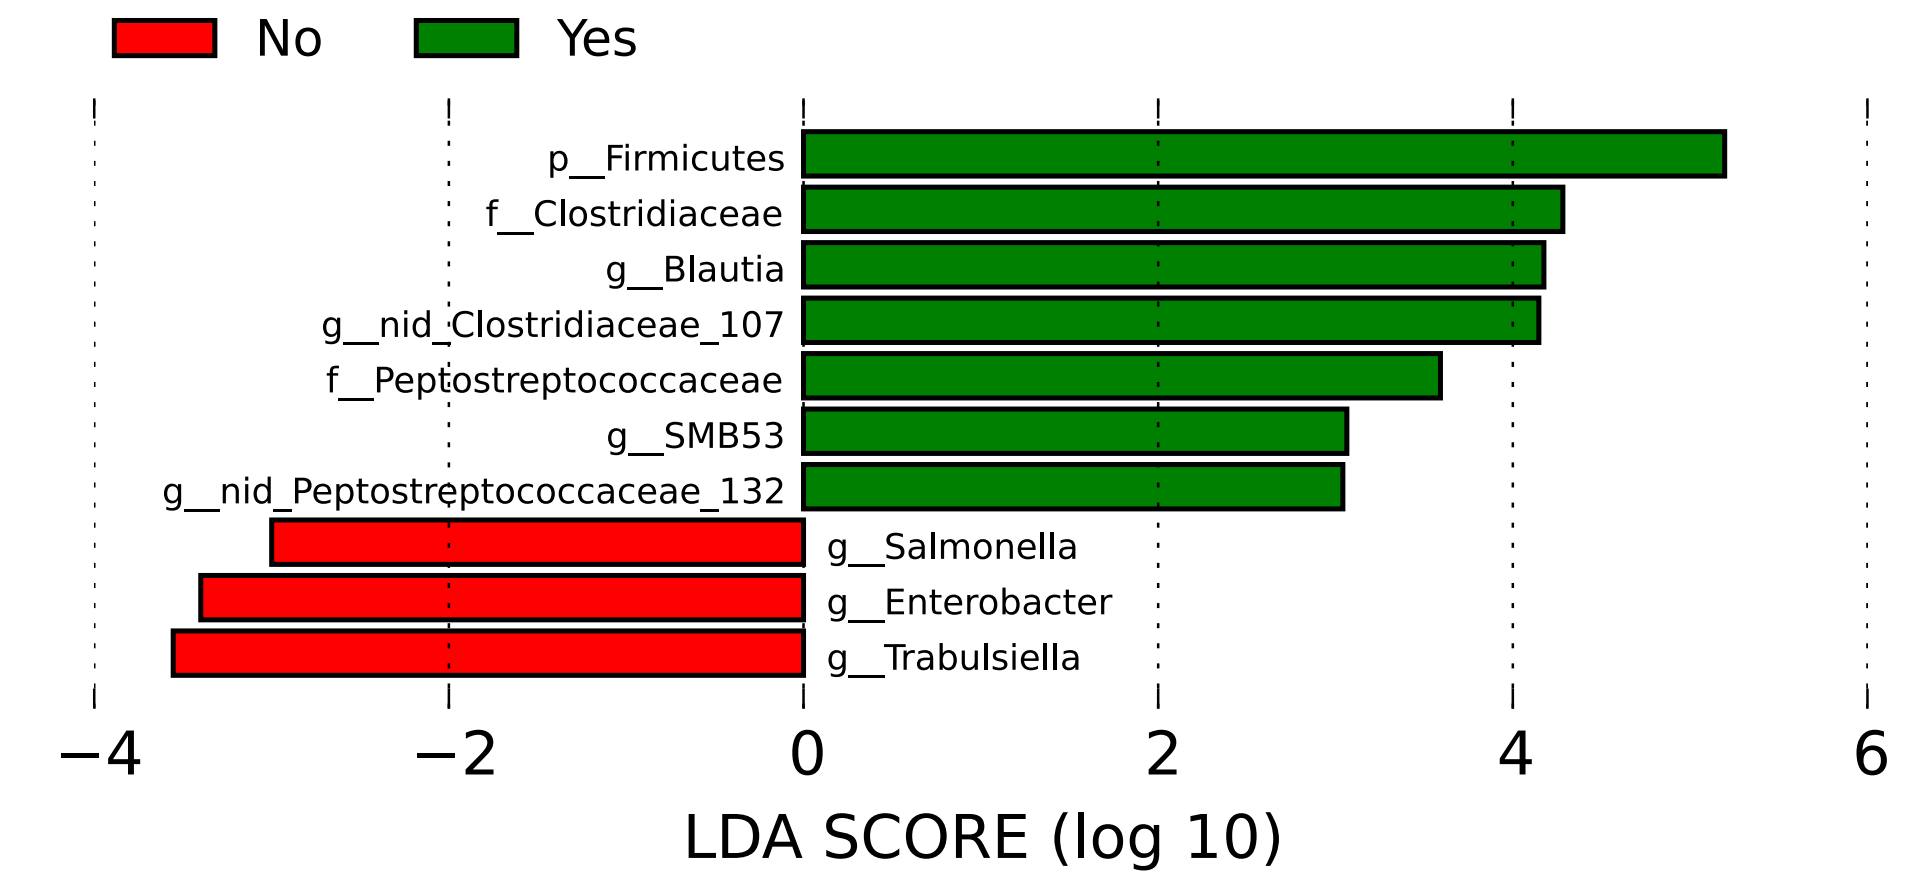

C-section

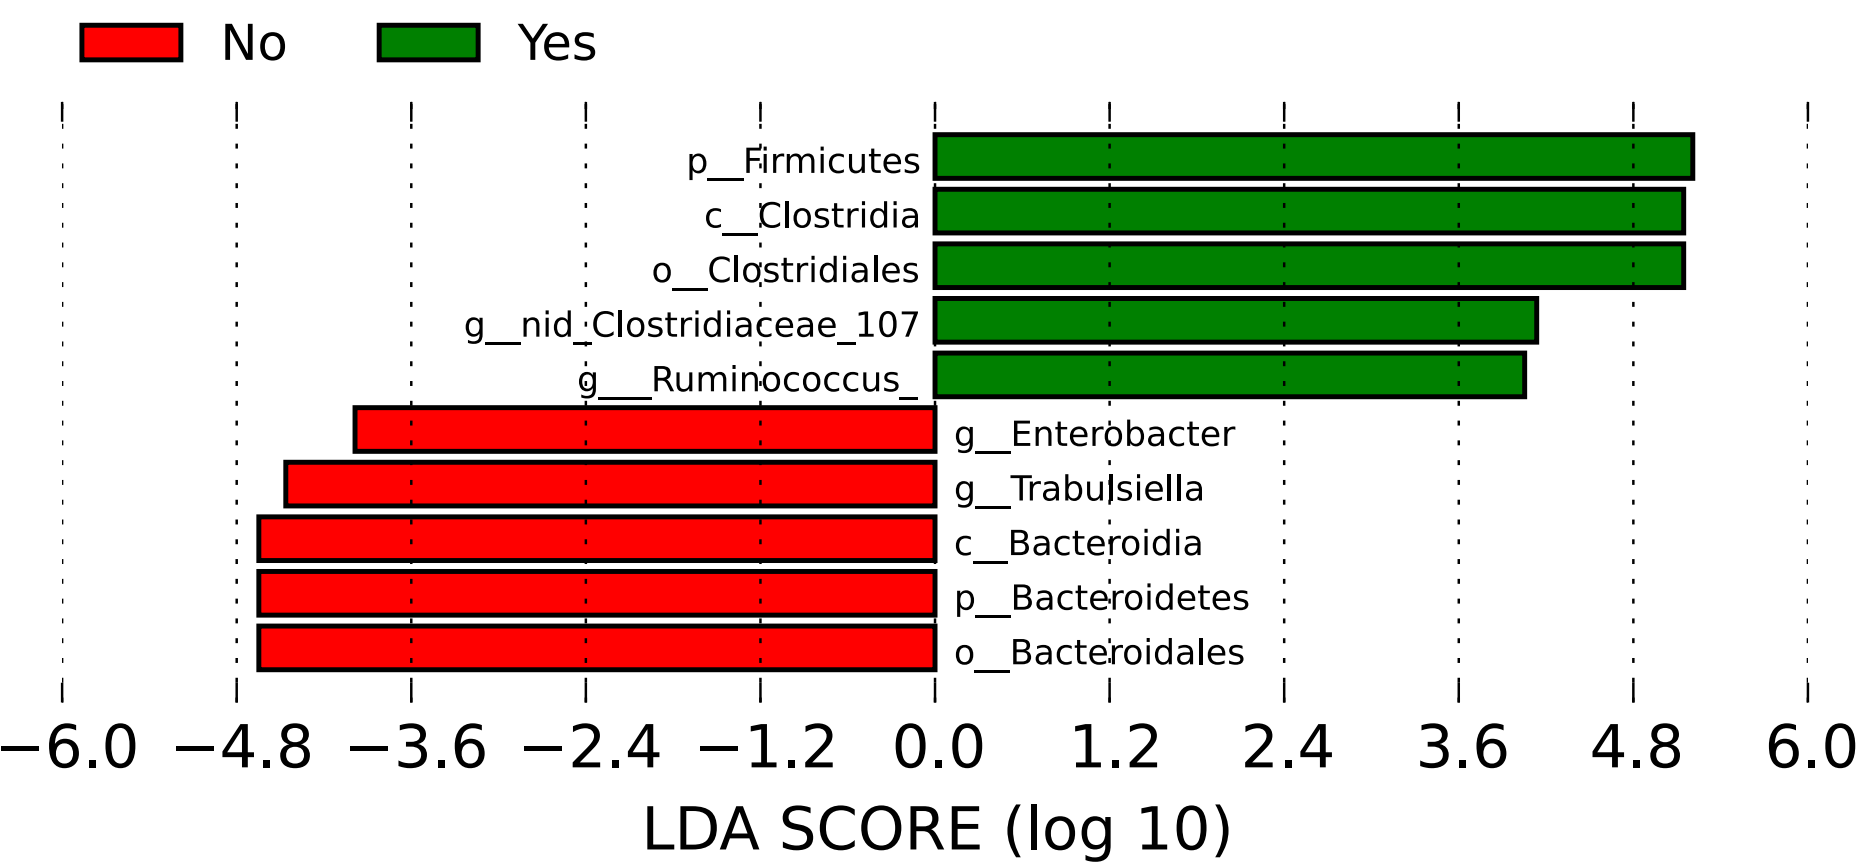

Race

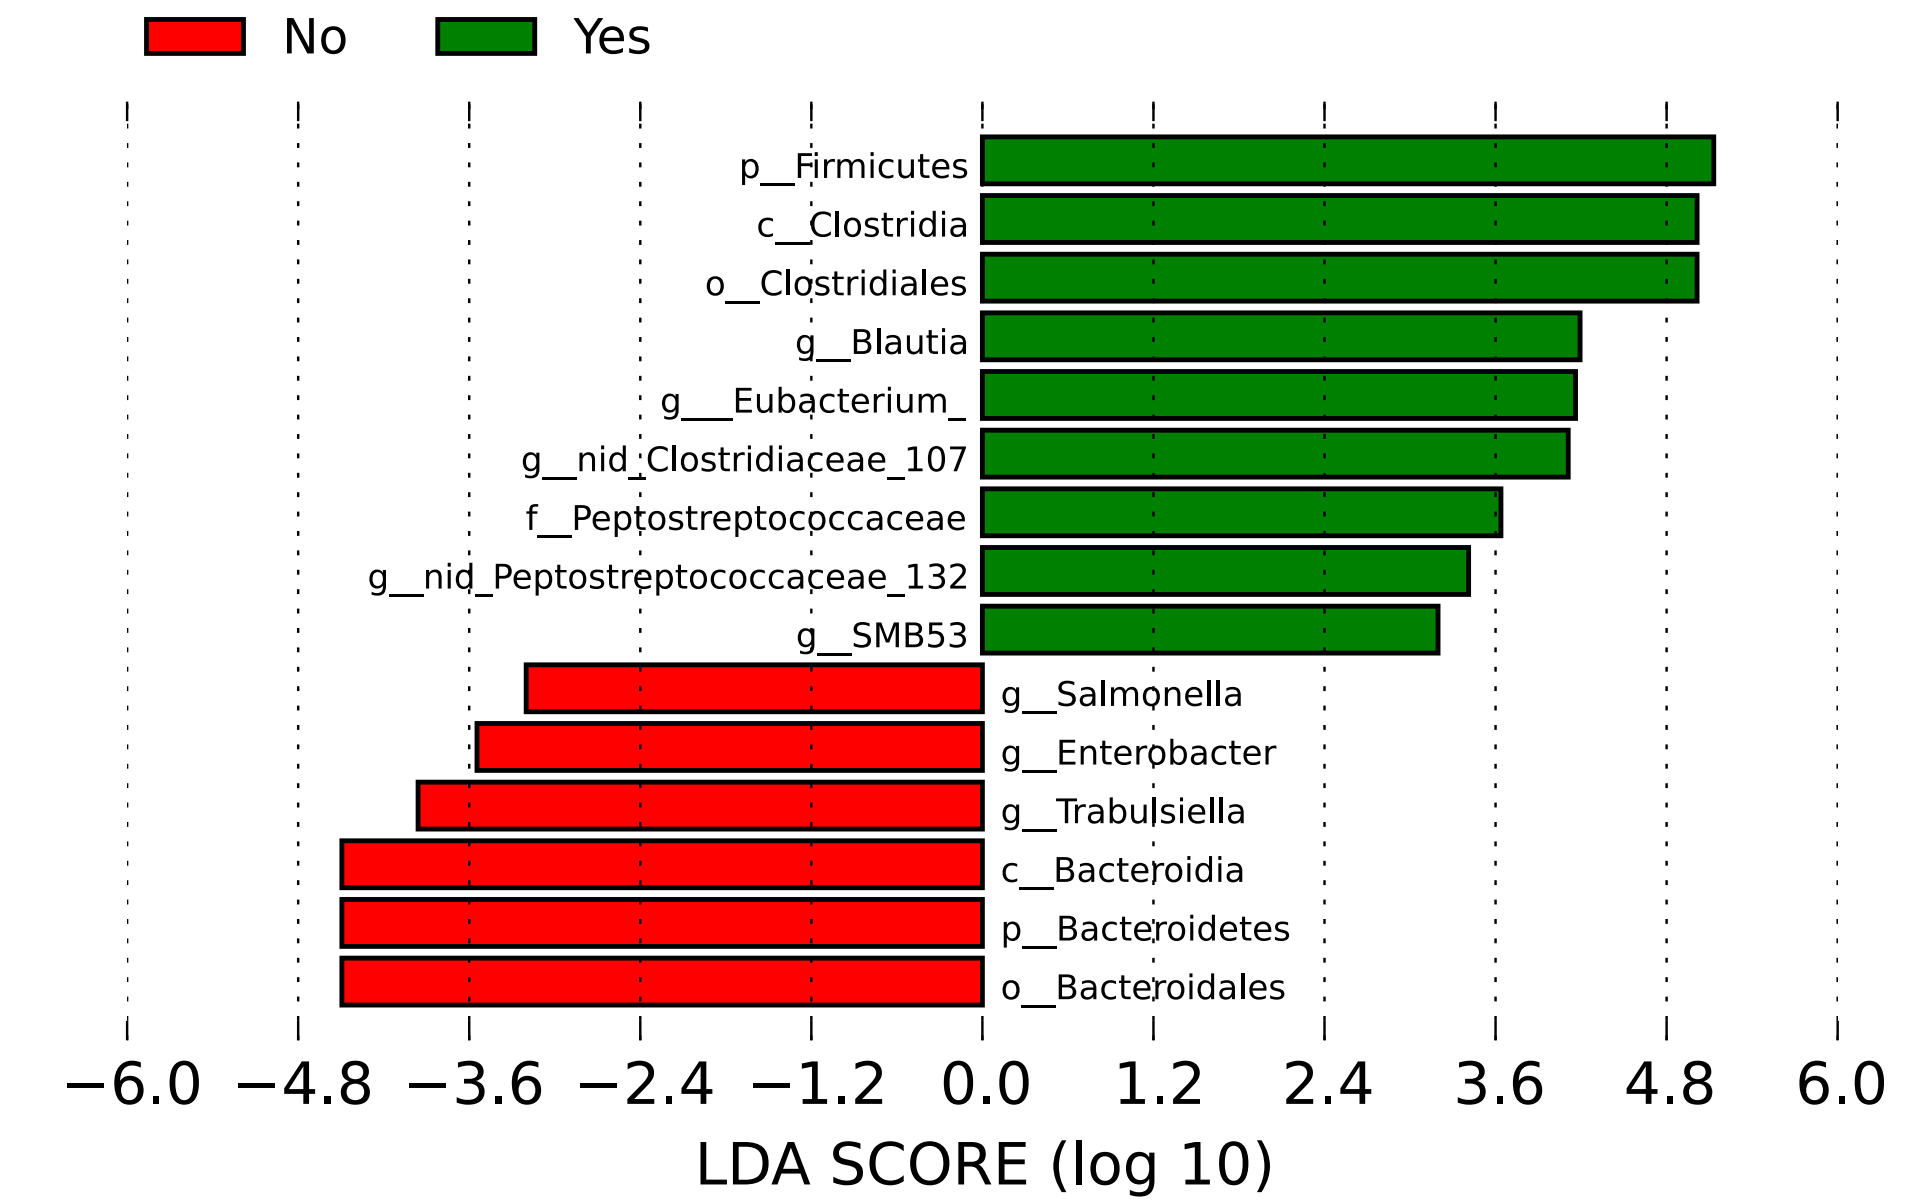

Solid food
